# Supplementary material for: Multi-Kinase Inhibitor with Anti-p38γ Activity in Cutaneous T-Cell Lymphoma
Source: PubMed Central journal article supplement — J Invest Dermatol. Author manuscript; Available in PMC 2020 Jun 3. (PMC7269016; doi:10.1016/j.jid.2018.04.030), 2018-07-14
Supplement: NIHMS1028104-supplement-Supplemental_tables_and_figures.pdf [file NIHMS1028104-supplement-Supplemental_tables_and_figures.pdf]

**Suppl. Table S1.** Primers used for the real time qRT-PCR experiments

| Genes  | Sequences                      |
|--------|--------------------------------|
| MAPK11 | Forward CCCGGACATATATCCAGTCC   |
|        | Reverse TCACTGCTCAATCTCCAGG    |
| MAPK12 | Forward GCCCATCCCTACTTCGAGTC   |
|        | Reverse CTTCACAGAGGCGTCTCCTT   |
| MAPK13 | Forward GGCAGTTTAACTGGCCTGTTA  |
|        | Reverse ACAGTGGATGAATGGAAGCAGC |
| MAPK14 | Forward GCCGAGCTGTTGACTGGAAG   |
|        | Reverse GGAGGTCCCTGCTTCAAAGG   |
| GAPDH  | Forward CCCGGACATATATCCAGTCC   |
|        | Reverse TCACTGCTCAATCTCCAGG    |

# Supplemental Figure S1

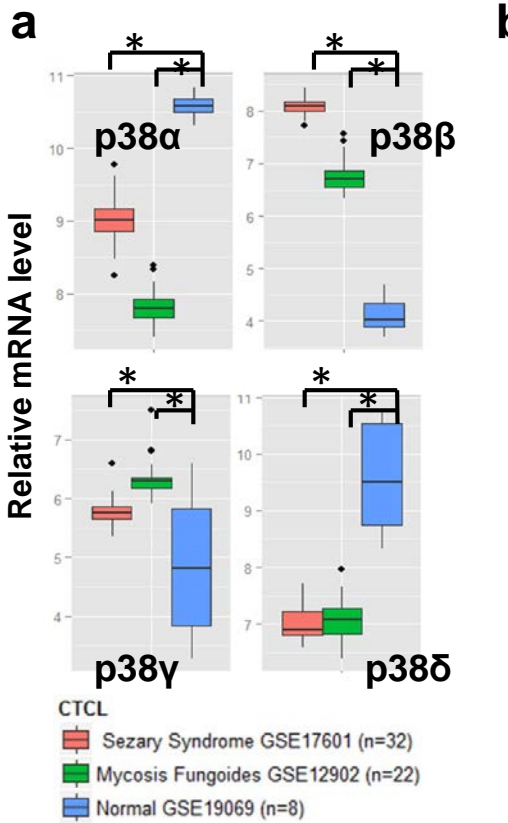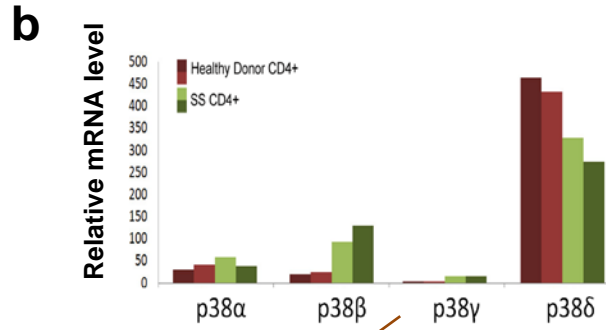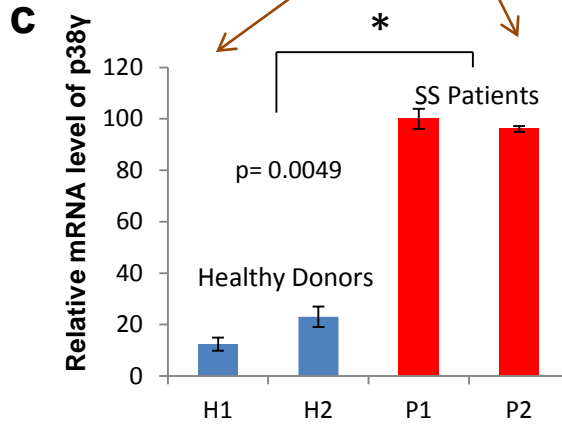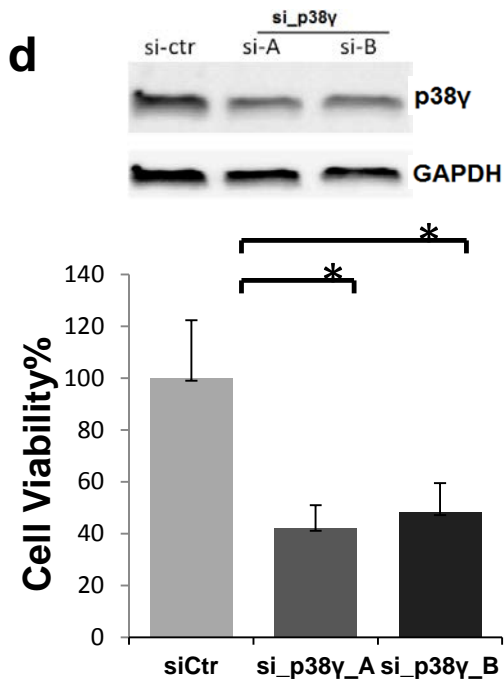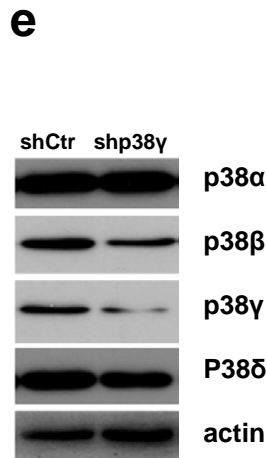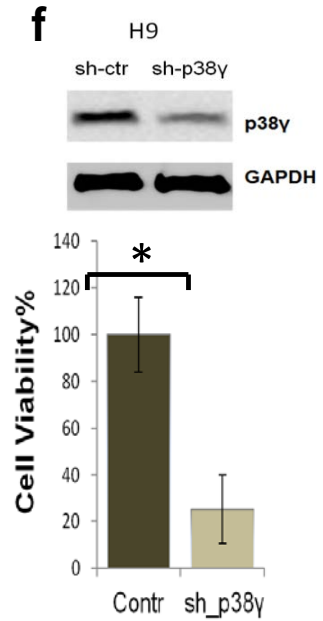

# Supplemental Figure S1

## **Figure S1. p38 $\gamma$ gene expression is limited in human tissues, and is important for viability in CTCL.**

- a) Publically available microarray databases were analyzed for mRNA expression of p38 isoforms in CTCL (GSE17601, n=32 for SS, pink; GSE12902, n=22 for MF, green) and healthy donors/primary CD4<sup>+</sup> T cell lines (GSE19069, n=8, blue). \*p<0.001.
- b) and c) QRT-PCR analysis was used to determine mRNA expression of indicated p38 isoforms (b) and p38 $\gamma$  (c), relative to their internal control GAPDH, in CD4<sup>+</sup> T cells isolated from healthy donors (n=2) or SS patients (n=2).
- d) Hut78 cells were treated with p38 $\gamma$  or control Cell viability presented as a percent of control-treated cells. Two siRNA sequences that targeting p38 $\gamma$  are indicated in the materials and methods. Three replicates performed for each sample, \*p<0.05e.
- e) Western blot was used to visualize protein expression of indicated p38 isoforms or actin (loading control) in Hut78 cells transduced with p38 $\gamma$  shRNA or scrambled control.
- f) Cell viability assay in H9 cells transduced with lentiviral particles with scrambled shRNA control or p38 $\gamma$  shRNA. Data are an average of 3 replicates. \*p<0.05.

**Supplemental Table S2. IC<sub>50</sub> (μM) of p38γ inhibitors F7, A10, and A11 in NCI60 cell line panel.**

| Cells       | F7/PIK75 | A10   | A11   | Disease  | Cells      | F7/PIK75 | A10  | A11   | Disease  |
|-------------|----------|-------|-------|----------|------------|----------|------|-------|----------|
| K-562       | 0.416    | > 10  | > 10  | CML      | UACC257    | 2.32     | > 10 | > 10  | Melanoma |
| RPMI-8226   | 0.077    | 9     | > 10  | MM       | LOX IMVI   | 0.073    | 4.4  | 3.58  | Melanoma |
| SR          | < 0.001  | 0.372 | 0.286 | Leukemia | SK-MEL-5   | > 10     | > 10 | > 10  | Melanoma |
| HL60        | 0.005    | 1.14  | 0.247 | AML      | MALME-3M   | 0.116    | > 10 | 3.05  | Melanoma |
| MOLT-4      | 0.527    | 5.2   | 6.98  | ALL      | UACC-62    | 0.362    | > 10 | 6.12  | Melanoma |
| CCRF-CEM    | 3.72     | 2.5   | 2.5   | Leukemia | SK-MEL-2   | 0.317    | > 10 | > 10  | Melanoma |
| NCI-H226    | 8.39     | > 10  | > 10  | Lung     | M14        | 0.195    | 10   | 3.33  | Melanoma |
| NCI-H460    | 0.01     | > 10  | 10    | Lung     | MDA-MB-435 | > 10     | 6.6  | > 10  | Melanoma |
| HOP-92      | 0.094    | 6.04  | 6.4   | Lung     | SK-MEL-28  | 1.69     | > 10 | 9.6   | Melanoma |
| NCI-H522    | > 10     | > 10  | > 10  | Lung     | T-47D      | > 10     | 6.19 | > 10  | Breast   |
| NCI-H322M   | 1.5      | > 10  | > 10  | Lung     | BT-549     | < 0.001  | 4.78 | 0.705 | Breast   |
| NCI-H23     | > 10     | > 10  | > 10  | Lung     | MDA-MB-231 | 0.466    | > 10 | > 10  | Breast   |
| HOP-62      | 0.008    | > 10  | 9.94  | Lung     | MCF7       | 0.238    | 10   | 3.77  | Breast   |
| EKVX        | 1.22     | > 10  | > 10  | Lung     | HS 578T    | 0.586    | 5.83 | > 10  | Breast   |
| A549        | 2.66     | > 10  | > 10  | Lung     | MDA-MB-468 | 0.103    | 6.97 | 1.77  | Breast   |
| HCT-15      | 0.008    | 3.84  | 2.54  | Colon    | U251       | 0.253    | 1.92 | 4.57  | CNS      |
| KM12        | 0.006    | > 10  | 2.28  | Colon    | SF-539     | 0.177    | 2.55 | 3.68  | CNS      |
| HCT-116     | 0.001    | 3.2   | 1.26  | Colon    | SF-268     | 2.23     | > 10 | > 10  | CNS      |
| HCC-2998    | > 10     | > 10  | > 10  | Colon    | SF-295     | 0.141    | > 10 | 7.64  | CNS      |
| Colo 205    | 2.18     | > 10  | > 10  | Colon    | SNB-19     | 0.385    | > 10 | > 10  | CNS      |
| SW-620      | 0.074    | > 10  | 3.93  | Colon    | SNB-75     | 0.435    | > 10 | 6.14  | CNS      |
| HT29        | 0.087    | > 10  | 5.04  | Colon    | UO31       | 0.115    | > 10 | 4.03  | Renal    |
| NCI/ADR-RES | 0.024    | 3.67  | 1.44  | Ovarian  | 786-0      | 0.008    | 7.77 | 9.3   | Renal    |
| OVCAR-3     | 0.071    | > 10  | 2.52  | Ovarian  | RXF 393    | 0.08     | > 10 | 3.47  | Renal    |
| SKOV3       | 0.291    | > 10  | > 10  | Ovarian  | ACHN       | 0.092    | 4.46 | > 10  | Renal    |
| IGR-OV1     | 0.251    | > 10  | > 10  | Ovarian  | A498       | 0.027    | > 10 | > 10  | Renal    |
| OVCAR-8     | 0.059    | > 10  | 3.6   | Ovarian  | CAKI-1     | 0.35     | > 10 | > 10  | Renal    |
| OVCAR-4     | 0.403    | > 10  | > 10  | Ovarian  | SN12C      | 0.468    | > 10 | 10    | Renal    |
| OVCAR-5     | 0.04     | > 10  | 5.31  | Ovarian  | TK-10      | 0.805    | > 10 | > 10  | Renal    |
| PC-3        | 0.02     | > 10  | 9.18  | Prostate | DU-145     | 0.001    | 1.38 | 2.26  | Prostate |

# Supplemental Figure S2

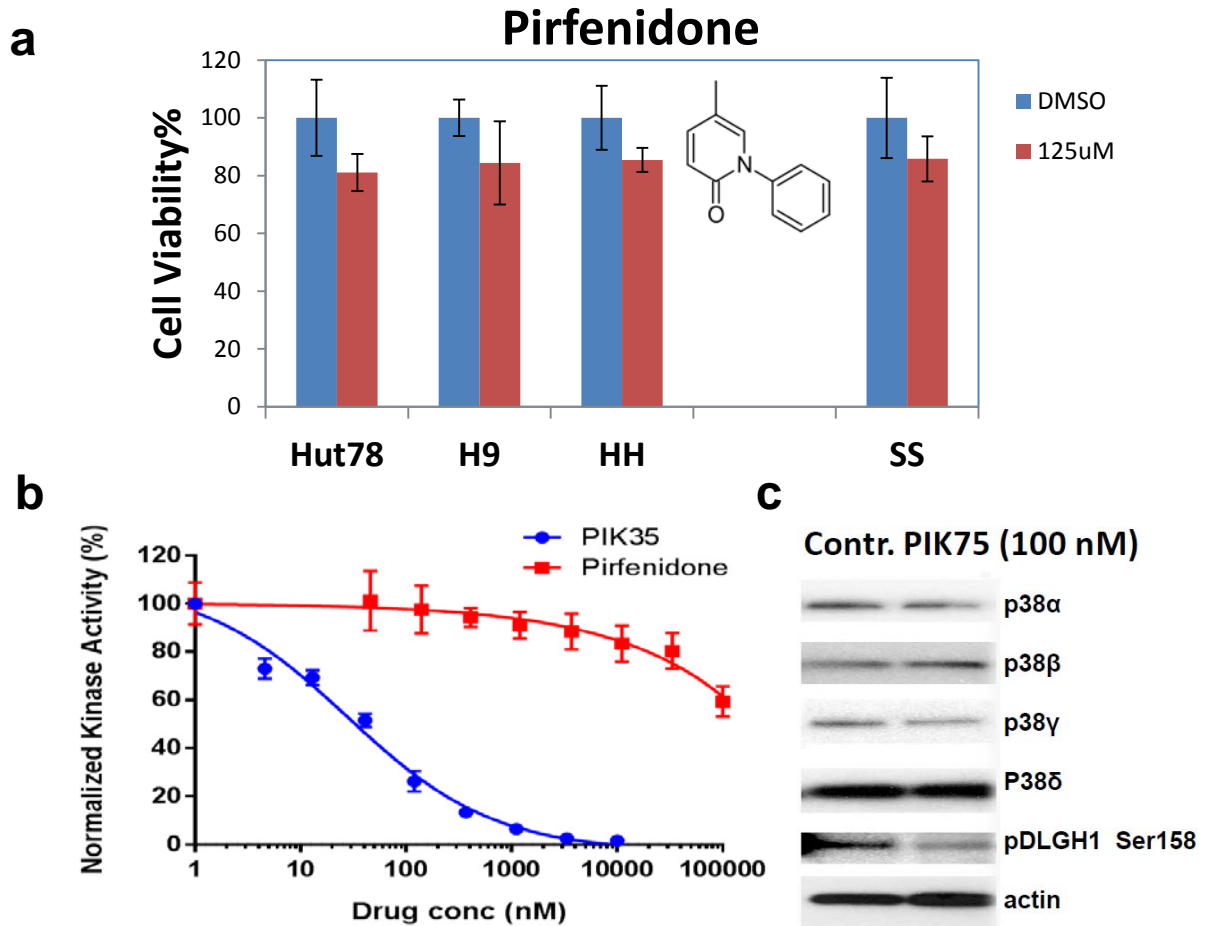

**Figure S2. p38 $\gamma$  inhibitors F7/PIK75 and pirfenidone**

a) IC<sub>50</sub> determination in CTCL cells by pirfenidone. CellTiterGlo assay was used to measure viability in Hut78, H9, or HH CTCL cell lines and one SS patient sample treated with DMSO (vehicle control) or Pirfenidone (125  $\mu$ M). Data are an average of 3 replicates.

b) p38 $\gamma$  inhibitor Pirfenidone effects on p38 $\gamma$  kinase activity. ADP-Glo *in vitro* kinase assay was used to measure p38 $\gamma$  kinase activity in with varying concentrations of F7 (PIK75) or Pirfenidone, normalized to DMSO control in cell-free-based assays. Data are an average of 3 replicates.

c) PIK75 interferes p38 $\gamma$  kinase activities. Western blot was used to visualize protein expression of indicated p38 isoforms, phosphorylated DLGH1 Ser158, and actin (loading control) in CD4<sup>+</sup> T cells from healthy donors (n=2) or SS patients (n= 2) treated with F7/PIK75 (100nM) or DMSO control for 24 h.

**Supplemental Table S3.** F7/PIK75 caused apoptosis in an SS patient sample and Hut78 cells.

| <b>PBMC</b>  | <b>Percentage</b> | <b>Live cells</b> | <b>AnnexV_PI</b> | <b>PI Stained</b> |
|--------------|-------------------|-------------------|------------------|-------------------|
| <b>SS</b>    | Control           | 87.3              | 4.26             | 4.78              |
|              | F7 (200nM)        | 42.797            | 17.8             | 35.2              |
| <b>Hut78</b> | Control           | 82.9              | 4.81             | 5.38              |
|              | F7 (200nM)        | 44.48             | 25.5             | 29.53             |

## Supplemental Figure S3

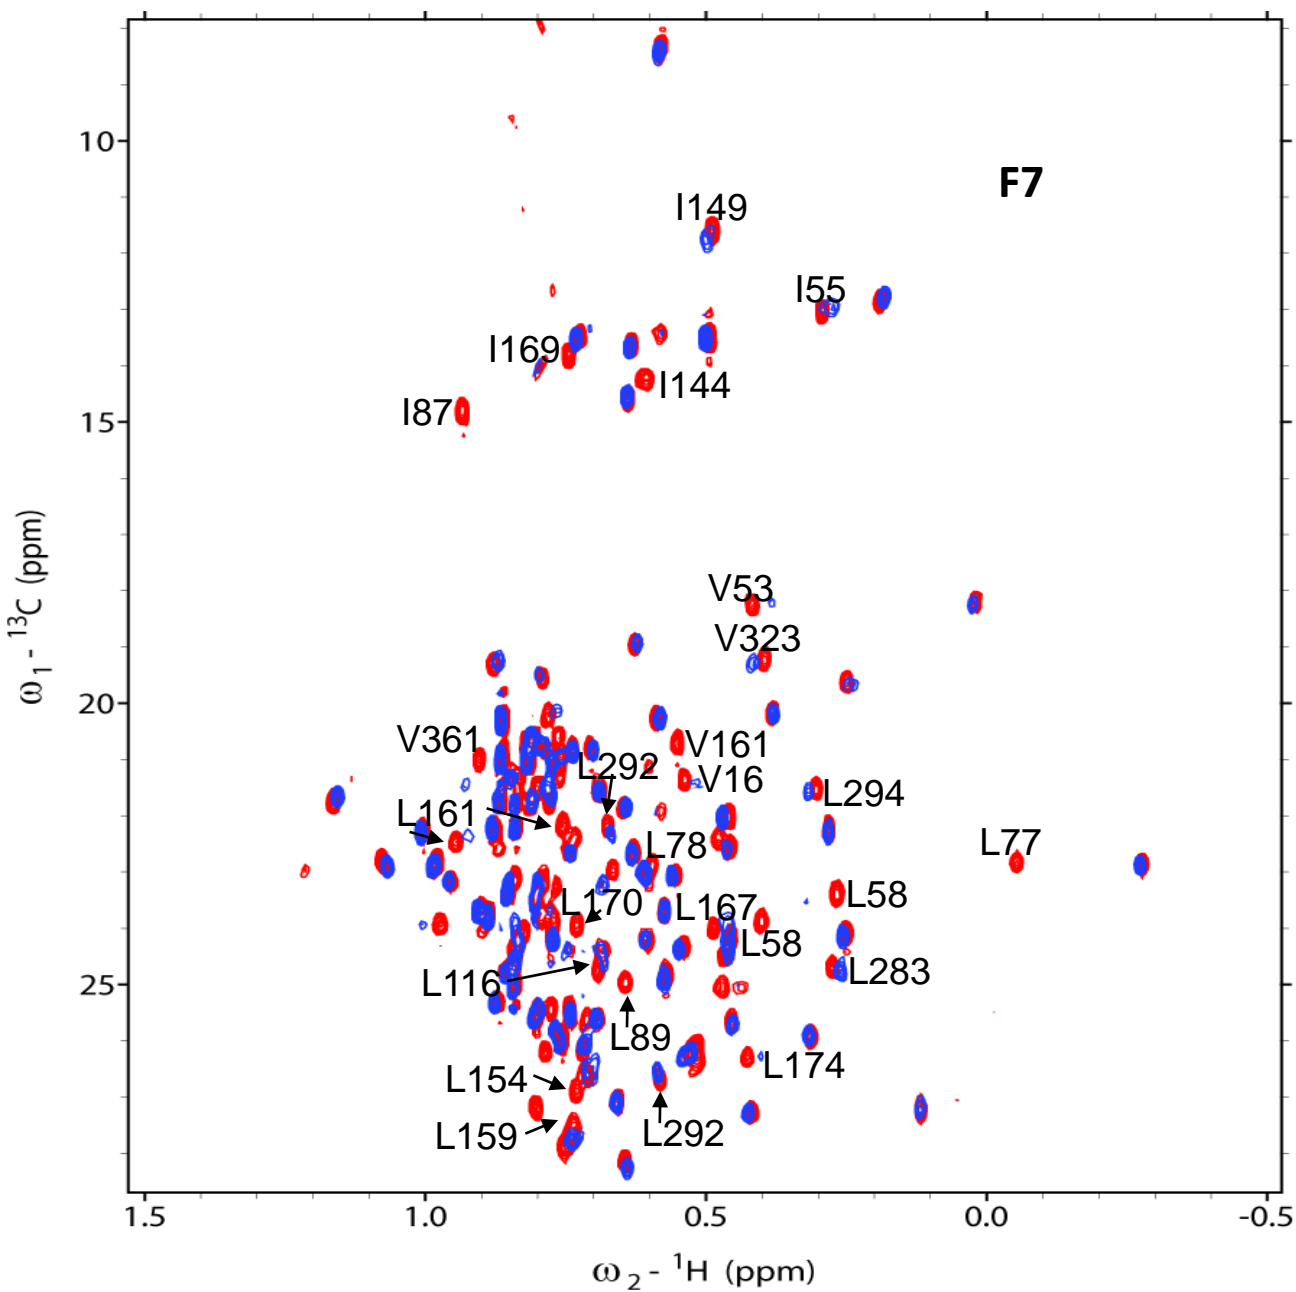

**Figure S3. Assignments of F7/PIK75 to p38 $\gamma$  residues by NMR experiment.**

Overlay of the  $^1\text{H}$ - $^{13}\text{C}$  HMQC spectra in the methyl region for p38 $\gamma$ , free (red), and in complex with F7/PIK75 (blue). The peaks that undergo large chemical shift changes (CSP  $> 0.05$  ppm) or line broadening are labeled with their corresponding residue number.

**Supplemental Table S4.** Effect of compound F7/PIK75 on p38 isoforms.

| <b>p38</b>                     | <b>%Inhib. 50nM</b> | <b>%Inhib. 200nM</b> |
|--------------------------------|---------------------|----------------------|
| <b>p38 <math>\alpha</math></b> | - 1.92%             | - 0.48685%           |
| <b>p38 <math>\beta</math></b>  | - 21.26%            | - 24.845%            |
| <b>p38 <math>\delta</math></b> | 5.35%               | 34.91%               |
| <b>p38 <math>\gamma</math></b> | 22.45%              | 58.98%               |



## Supplemental Table S5.

NanoString RNA and IPA data analysis revealed top 9 pathways in Hut78 cells altered by F7/PIK75 treatment (50 nM for 10 h) including 2 upregulated pathways and 7 downregulated pathways.

| Pathway Name                                      | Exp fold change | Activation z-score | p-value   |
|---------------------------------------------------|-----------------|--------------------|-----------|
| NF-kB signaling                                   | -0.633          | -3.623             | 5.76 E-90 |
| Th2 pathway                                       | -0.687          | -2.236             | 7.96 E-87 |
| Th1 pathway                                       | -0.719          | -3.533             | 6.95 E-85 |
| IL-6 Signaling                                    | -0.717          | -3.109             | 1.80E-79  |
| Role of NFAT in regulation of the immune response | -0.53           | -3.962             | 7.96 E-67 |
| PI3K signaling                                    | -0.586          | -3.108             | 1.04E-55  |
| PTEN                                              | 0.588           | 1.25               | 3.21 E-52 |
| PI3KI/AKT signaling                               | -0.54           | -0.63              | 1.11E-46  |
| Wnt/B-catenin signaling                           | 0.426           | 1.152              | 5.70E-41  |

## Supplemental Figure S4

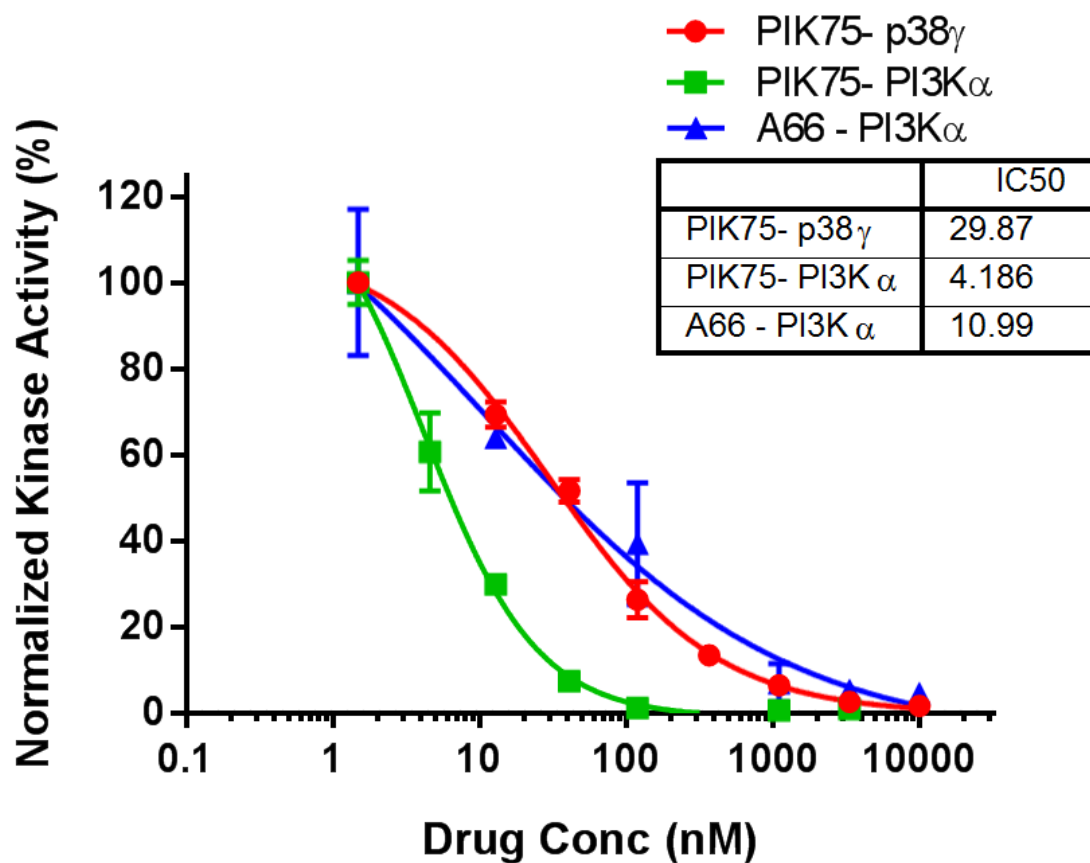

**Figure S4.** A66 effects on cell-based analysis. Western blot was used to visualize A66 effects on Hut78 cells, indicated by protein expression level of downstream targets of PI3Kp110 $\alpha$ . GAPDH is a control for protein loading.
